# Supplementary material for: Temporal stability of functional brain modules associated with human intelligence
Source: PubMed Central journal article supplement (PMC7267930; doi:10.1002/hbm.24807), 2019-10-06
Supplement: HBM-41-362-s001.pdf [file HBM-41-362-s001.pdf]

## SUPPORTING INFORMATION

### Temporal Stability of Functional Brain Modules Associated with Human Intelligence

Kirsten Hilger<sup>1,2,\*</sup>, Makoto Fukushima<sup>3</sup>, Olaf Sporns<sup>3,a</sup>, Christian J. Fiebach<sup>1,2,4,a</sup>

<sup>1</sup> Department of Psychology, Goethe University, Theodor-W.-Adorno-Platz 6, 60323 Frankfurt am Main, Germany

<sup>2</sup> IDeA Center for Individual Development and Adaptive Education, Rostocker Str. 5, 60323 Frankfurt am Main, Germany

<sup>3</sup> Department of Psychological and Brain Sciences, Indiana University, Psychology Building 360, 1101 E 10<sup>th</sup> Street, Bloomington, IN 47405, USA

<sup>4</sup> Brain Imaging Center, Goethe University Frankfurt, Schleusenweg 2-16, 60528 Frankfurt am Main, German

<sup>a</sup> These authors should be considered joint senior author

ORCID:

Kirsten Hilger: 0000-0003-3940-5884

Makoto Fukushima: 0000-0003-2345-2598

Olaf Sporns: 0000-0001-7265-4036

Christian J. Fiebach: 0000-0003-0827-1721

\* Corresponding author:

Kirsten Hilger

Goethe University Frankfurt, Department of Psychology

Theodor-W.-Adorno-Platz 6, PEG

D-60323 Frankfurt am Main

Phone: +49 (0)69 / 798 - 35345

hilger@psych.uni-frankfurt.de

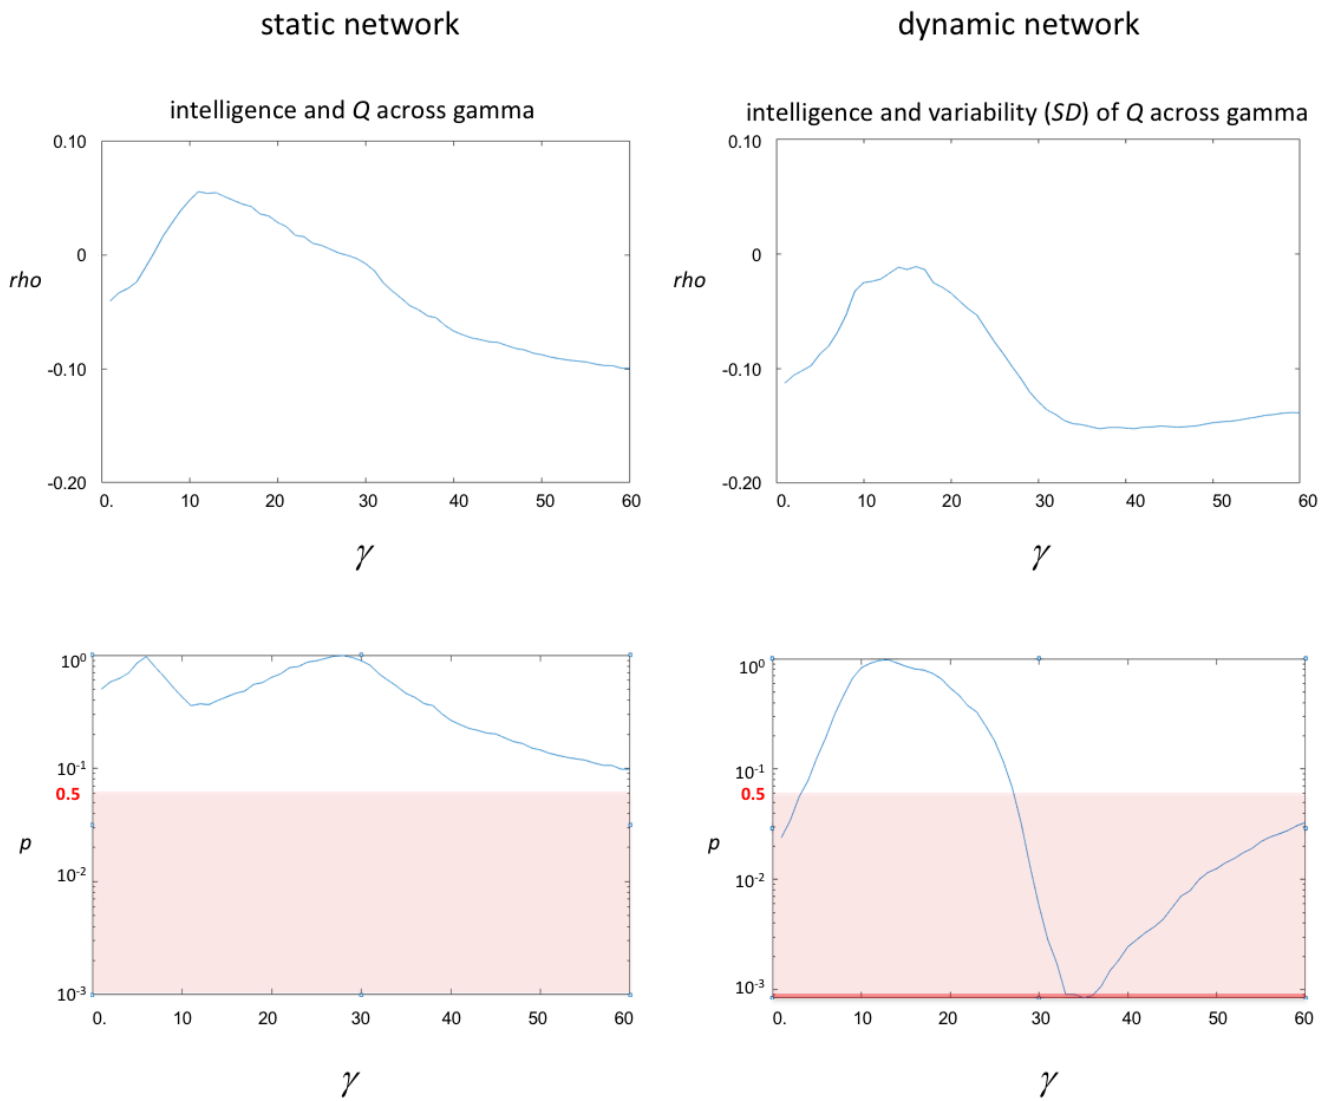

**FIGURE S1** Associations between intelligence and (variability of) global modularity across varying resolution levels. *Left:* Association between intelligence and global modularity  $Q$  in static (i.e., time-averaged) networks, for different levels of the network resolution parameter gamma ( $\gamma$ ; x-axis). *Right:* Association between intelligence and the variability in global modularity (operationalized as standard deviation of  $Q_{ind}$  across time) in dynamic networks, displayed across gamma ( $\gamma$ ) levels. *Bottom row:* Significance levels ( $p$ -values, uncorrected for multiple comparisons) across different network resolutions (gamma levels); area indicating  $p$ -values  $< .05$  is marked in red; area indicating  $p$ -values  $< .00083$  (Bonferroni corrected for 60 multiple comparisons) is marked in dark red.  $Q$ , global modularity of individual-specific module partitions;  $SD$ , standard deviation;  $rho$ , Spearman correlation coefficient for the partial-correlation between intelligence and ( $SD$  of)  $Q$  after controlling for effects of age, sex, handedness, and mean framewise displacement;  $\gamma$ , resolution parameter gamma (adjusting size/number of modules received from modularity maximization).

**A**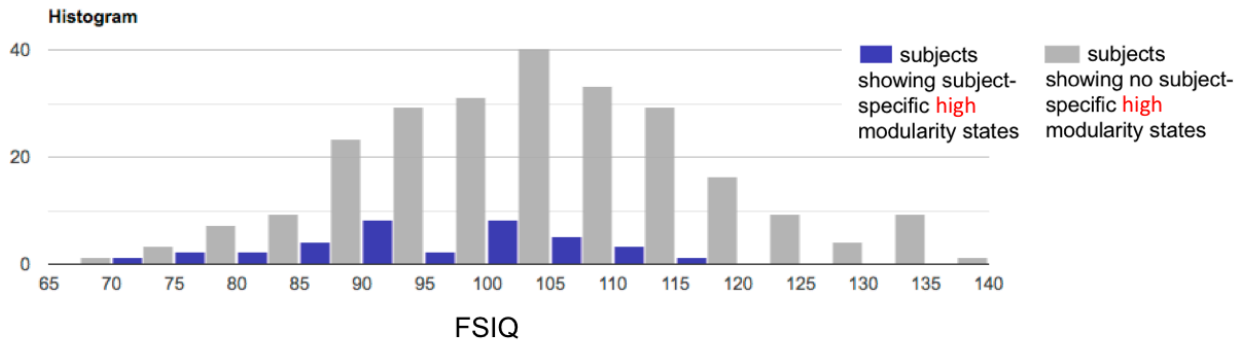**B**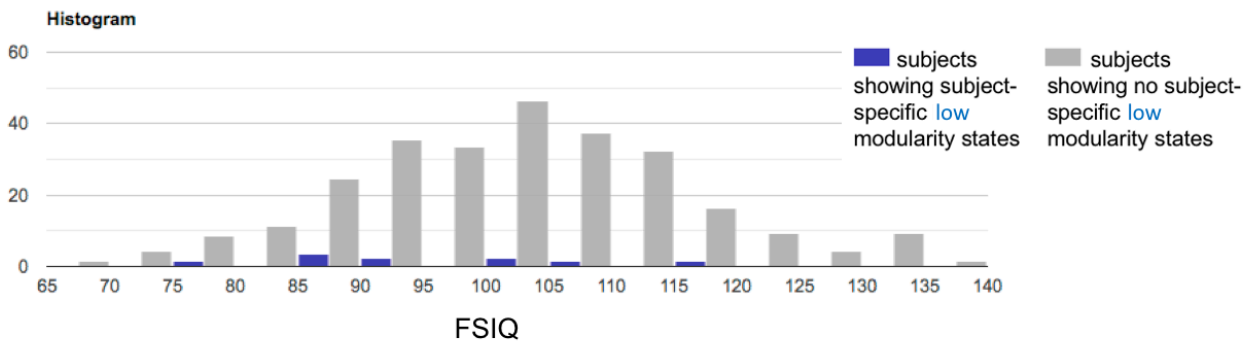

**FIGURE S2** Histograms of intelligence scores for subjects demonstrating subject-specific states of (A) extreme high modularity and (B) states of extreme low modularity (blue) in comparison with subjects demonstrating no such states (grey).
